# Supplementary material for: Phages ZC01 and ZC03 require type-IV pilus for Pseudomonas aeruginosa infection and have a potential for therapeutic applications
Source: PubMed Central journal article supplement (PMC11619397; doi:10.1128/spectrum.01527-24), 2024-10-29
Supplement: spectrum.01527-24-s0003.pdf [file spectrum.01527-24-s0003.pdf]

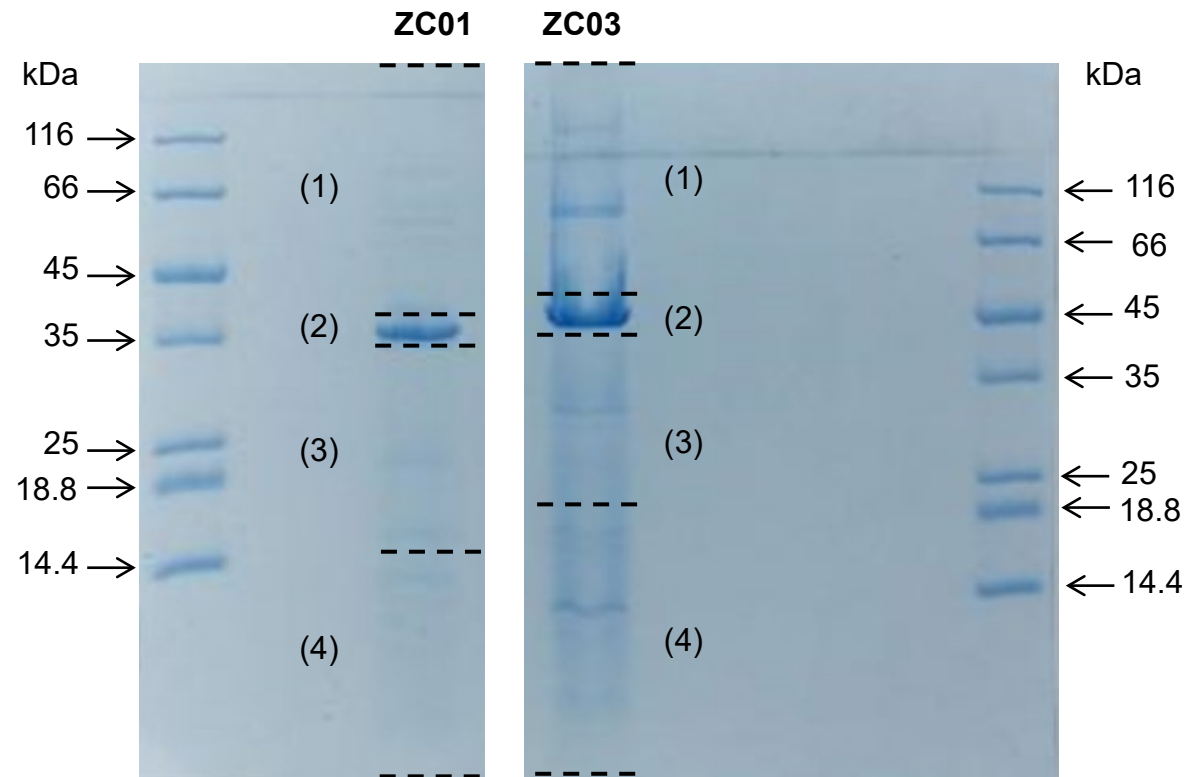

**Figure S3.** ZC01 and ZC03 phage particles ( $\sim 100\mu\text{g}$  of total protein) were subjected to 15% SDS-PAGE. Polypeptides were visualized by staining with 0.1% Coomassie blue G250. After destaining, the gel regions were cut out (dashed lines), transferred to microtubes for in-gel digestion and mass spectrometry-based proteomics. The molecular masses of marker proteins in kDa are indicated.
